# Supplementary material
Source: PubMed Central journal article supplement (PMC1686202)
Supplement: rsbl20060484s16.pdf [file rsbl20060484s16.pdf]

## Supplementary Table 1. Complete list of putative binding sites or regions

Among the 220 genomic strings mentioned in the RA literature, 44 are orthologs of others. Once they are removed, a nonredundant set of 176 elements remains, and is shown in the Table below.

Forty of the remaining sequences constitute Retinoic Acid Response Element-like motifs that have been noted but not tested. They were excluded from this paper, and are marked “Motif(s) only”. We also eliminated elements found only in fish or birds, but not (so far) in mammals; genes for which we could not confidently find orthologs are marked “Orthologs”, and intronic elements, which we did not include, are also marked. Finally, we excluded strings in repeats and a group of strings that are probably spurious or otherwise problematic. For example, one lies near a gap in the current rat assembly; another is in the coding region of an adjacent gene and is probably spurious; and there is a group of “sites” have been said to suppress transcription upon the addition of ligand—a phenomenon that is generally discounted in the field and for which no mechanism has been proposed. Most likely, they represent indirect activity (through one or more other transcription factors).

**Gene** is the symbol for the gene in nomenclature of the species (first) studied; **Loc** is with respect to the most relevant known transcription start site; **Sp** shows the species in which the site was first identified; **Ref PMID** is the Pub Med Identifier for the original paper(s) most relevant to the site; **GI** is the GenBank Gene Identifier; **Reason Excluded**, where applicable, is self-explanatory.

| No. | Gene           | Loc   | Sp | Ref PMID                  | GI       | Reason Excluded          |
|-----|----------------|-------|----|---------------------------|----------|--------------------------|
| 1   | <i>Abcc2</i>   | -413  | Rn | 10722729                  | 3021574  | NA                       |
| 2   | <i>ACADM</i>   | -336  | Hs | 1328196                   | 4557230  | NA                       |
| 3   | <i>ADH1C</i>   | -300  | Hs | 1996113                   | 178116   | Orthologs                |
| 4   | <i>Adrb1</i>   | -41   | Rn | 9448745                   | 220670   | NA                       |
| 5   | <i>Afp</i>     | -6327 | Rn | 7525384                   | 202783   | NA                       |
| 6   | <i>Afp</i>     | -2405 | Rn | 8945636                   | 34876954 | Rat assembly problem     |
| 7   | <i>Afp</i>     | -1961 | Rn | 7528016                   | 202783   | NA                       |
| 8   | <i>Afp</i>     | -139  | Rn | 7512261                   | 202783   | NA                       |
| 9   | <i>Akp2</i>    | -5095 | Mm | 8817450                   | 20786316 | Orthologs; Motif(s) only |
| 10  | <i>Aldh1a1</i> | -91   | Hs | 10995752                  | 178358   | NA                       |
| 11  | <i>Apoa1</i>   | -210  | Hs | 8626539                   | 178771   | NA                       |
| 12  | <i>Apoa1</i>   | -132  | Hs | 0008626539;<br>0001646397 | 178771   | NA                       |
| 13  | <i>APOA2</i>   | -733  | Hs | 8668150                   | 28757    | NA                       |
| 14  | <i>Apoc3</i>   | -732  | Hs | 9893992                   | 178839   | NA                       |
| 15  | <i>Apoc3</i>   | -672  | Hs | 9893992                   | 178839   | Probably spurious “site” |

| No. | Gene           | Loc      | Sp | Ref PMID                  | GI       | Reason Excluded                  |
|-----|----------------|----------|----|---------------------------|----------|----------------------------------|
| 16  | <i>Apoc3</i>   | -83      | Hs | 0009893992;<br>0009691099 | 178839   | NA                               |
| 17  | <i>APP</i>     | Intron 7 | Hs | 10727079                  | 2429080  | Motif(s) only; Intronic          |
| 18  | <i>AQP1</i>    | -2218    | Hs | 12051745                  | 3135285  | NA                               |
| 19  | <i>ARR3</i>    | -727     | Hs | 11980849                  | 11414583 | Motif(s) only; Probably spurious |
| 20  | <i>ASB2</i>    | -133     | Hs | 11566180                  | 15777898 | Repeat                           |
| 21  | <i>BGLAP</i>   | -511     | Hs | 2159384                   | 3252209  | Orthologs                        |
| 22  | <i>Bmp2</i>    | -2373    | Mm | 9880512                   | 51712651 | NA                               |
| 23  | <i>BTK</i>     | -201     | Hs | 7927535                   | 17486439 | Motif(s) only                    |
| 24  | <i>C3</i>      | -268     | Hs | 11368771                  | 29544    | Motif(s) only                    |
| 25  | <i>Ca2</i>     | -1211    | Gg | 10799323                  | 63115    | Bird only                        |
| 26  | <i>CAMK2A</i>  | 5' UTR   | Hs | 8795626                   | 51511721 | Motif(s) only; Probably spurious |
| 27  | <i>Cd38</i>    | 745      | Hs | 9624127                   | 3273305  | Intronic                         |
| 28  | <i>CDKN1A</i>  | -1212    | Hs | 8940196                   | 902576   | Orthologs; Repeat                |
| 29  | <i>Cdx1</i>    | -511     | Mm | 10938132                  | 402307   | NA                               |
| 30  | <i>CEBPE</i>   | 42       | Hs | 10330422                  | 1399174  | Intronic                         |
| 31  | <i>CETP</i>    | -158     | Hs | 10329401                  | 1732066  | Orthologs; Motif(s) only         |
| 32  | <i>Cfh</i>     | -56      | Mm | 1700780                   | 193805   | Orthologs                        |
| 33  | <i>Chat</i>    | various  | Mm | 7790895                   | 220364   | Motif(s) only                    |
| 34  | <i>Clu</i>     | -2810    | Rn | 9547504                   | 207525   | Motif(s) only                    |
| 35  | <i>Cntn1</i>   | various  | Mm | 9332725                   | 861196   | Motif(s) only; Probably spurious |
| 36  | <i>Col1a1</i>  | -1345    | Rn | 9077477                   | 467809   | Down regulation                  |
| 37  | <i>Col1a1</i>  | -562     | Mm | 10729205                  | 191856   | Down regulation                  |
| 38  | <i>Col1a2</i>  | -900     | Mm | 1429872;<br>0010729205    | 15291107 | Down regulation                  |
| 39  | <i>Crabp1</i>  | -1008    | Mm | 9392513                   | 237797   | NA                               |
| 40  | <i>CRABP2</i>  | -5654    | Hs | 0008071361;<br>0009856825 | 497656   | Coding region of another gene    |
| 41  | <i>Crabp2</i>  | -1090    | Mm | 1327537                   | 192707   | NA                               |
| 42  | <i>Crabp2</i>  | -586     | Hs | 9856825                   | 18549451 | NA                               |
| 43  | <i>CRABP2</i>  | -454     | Hs | 1334086                   | 18549451 | Motif(s) only                    |
| 44  | <i>Cryab</i>   | -132     | Mm | 9651402                   | 191551   | NA                               |
| 45  | <i>Cryab</i>   | -69      | Mm | 9651402                   | 191551   | NA                               |
| 46  | <i>Crygf</i>   | -207     | Mm | 8436299                   | 192784   | Orthologs                        |
| 47  | <i>CSH1</i>    | -969     | Hs | 7589779                   | 183148   | Orthologs; Repeat                |
| 48  | <i>CSH1</i>    | -538     | Hs | 7589779                   | 183148   | Orthologs                        |
| 49  | <i>CYP1A1</i>  | -468     | Hs | 8024563                   | 30346    | NA                               |
| 50  | <i>CYP24A1</i> | -291     | Hs | 9228086                   | 1418240  | NA                               |
| 51  | <i>CYP24A1</i> | -269     | Hs | 9228086                   | 1418240  | NA                               |
| 52  | <i>CYP4F2</i>  | -708     | Hs | 11162441                  | 3347821  | Orthologs                        |

| No. | Gene             | Loc   | Sp | Ref PMID                  | GI       | Reason Excluded          |
|-----|------------------|-------|----|---------------------------|----------|--------------------------|
| 53  | <i>Cyp7a1</i>    | -139  | Mm | 9799805                   | 797278   | NA                       |
| 54  | <i>DIO1</i>      | -105  | Hs | 9492050                   | 2315182  | NA                       |
| 55  | <i>Drd2</i>      | -66   | Rn | 9405615                   | 34865068 | NA                       |
| 56  | <i>Ebaf</i>      | -70   | Mm | 9496783                   | 2347041  | NA                       |
| 57  | <i>EGFR</i>      | 67    | Hs | 2169350                   | 4885198  | Intronic                 |
| 58  | <i>Egr1</i>      | -469  | Rn | 7877619                   | 26017808 | NA                       |
| 59  | <i>Epo</i>       | 3198  | Hs | 11050012;<br>1448072      | 3135305  | Intronic                 |
| 60  | <i>ETS1</i>      | -432  | Hs | 11327309                  | 31263    | NA                       |
| 61  | <i>Ets1</i>      | 41    | Mm | 10773887                  | 11761707 | Intronic                 |
| 62  | <i>FBP1</i>      | -340  | Hs | 10731708                  | 1000070  | Repeat                   |
| 63  | <i>Fgf8</i>      | -4542 | Hs | 12054865                  | 5801866  | NA                       |
| 64  | <i>Foxa1</i>     | -1094 | Mm | 10388516                  | 22138698 | NA                       |
| 65  | <i>FSCN2</i>     | -24   | Hs | 10783262                  | 3172526  | Motif(s) only            |
| 66  | <i>Gh1</i>       | -190  | Rn | 8384845                   | 56221    | NA                       |
| 67  | <i>Gnrh1</i>     | -1490 | Mm | 11245923                  | 915407   | NA                       |
| 68  | <i>GPX2</i>      | -1021 | Hs | 10498757                  | 4504102  | Motif(s) only            |
| 69  | <i>GPX2</i>      | 460   | Hs | 10498757                  | 4504102  | Motif(s) only; Intronic  |
| 70  | <i>GSTP1</i>     | 1521  | Hs | 9679546                   | 726097   | Intronic                 |
| 71  | <i>GSTP1</i>     | 1552  | Hs | 9679546                   | 726097   | Intronic                 |
| 72  | <i>H1fo</i>      | -531  | Mm | 8078070                   | 193849   | NA                       |
| 73  | <i>H2 region</i> | -210  | Mm | 8413217                   | 199413   | Orthologs; Motif(s) only |
| 74  | <i>H2 region</i> | 562   | Mm | 8604312                   | 51154    | Orthologs; Intronic      |
| 75  | <i>Hnf4a</i>     | -295  | Mm | 11585914                  | 998414   | NA                       |
| 76  | <i>Hoxa1</i>     | 4661  | Mm | 1360810                   | 14626313 | Intronic                 |
| 77  | <i>Hoxa4</i>     | -3054 | Hs | 8759021                   | 1399048  | NA                       |
| 78  | <i>Hoxa7</i>     | -238  | Hs | 12068955                  | 1781003  | NA                       |
| 79  | <i>Hoxa7</i>     | -175  | Hs | 12068955                  | 1781003  | NA                       |
| 80  | <i>Hoxb1</i>     | -1623 | Mm | 0007916164;<br>0007831296 | 11024922 | NA                       |
| 81  | <i>Hoxb1</i>     | 3208  | Mm | 0007914354;<br>0007831297 | 11024922 | Intronic                 |
| 82  | <i>Hoxb1</i>     | 7045  | Mm | 8999919                   | 11024922 | Intronic                 |
| 83  | <i>Hoxb4</i>     | 5835  | Mm | 9697850                   | 11024922 | Intronic                 |
| 84  | <i>Hoxb5</i>     | 8141  | Hs | 12514132                  | 29799031 | Intronic                 |
| 85  | <i>Hoxd4</i>     | -2551 | Mm | 0002159384;<br>0008093325 | 1791004  | NA                       |
| 86  | <i>Hoxd4</i>     | 3379  | Mm | 10940626                  | 17530755 | Intronic                 |
| 87  | <i>HSD17B1</i>   | -503  | Hs | 8614400                   | 806392   | Repeat                   |
| 88  | <i>IBSP</i>      | -1038 | Hs | 8061918                   | 438617   | Motif(s) only; Repeat    |

| No. | Gene              | Loc     | Sp | Ref PMID                                 | GI         | Reason Excluded                                   |
|-----|-------------------|---------|----|------------------------------------------|------------|---------------------------------------------------|
| 89  | <i>Icam1</i>      | -225    | Hs | 0001983003;<br>0007647034;<br>0007737364 | 32621      | NA                                                |
| 90  | <i>Igfbp6</i>     | -27     | Hs | 11267670                                 | 4210703    | NA                                                |
| 91  | <i>INS</i>        | -1032   | Hs | 7639703                                  | 186429     | In human repetitive polymorphism                  |
| 92  | <i>ITGAM</i>      | various | Hs | 1347945                                  | 188606     | Motif(s) only                                     |
| 93  | <i>ITGB2</i>      | various | Hs | 1346252                                  | 180022     | Motif(s) only                                     |
| 94  | <i>Itgb3</i>      | -151    | Gg | 8702813                                  | 441308     | Bird only                                         |
| 95  | <i>Itgb7</i>      | various | Mm | 8318458                                  | 1682985    | Motif(s) only                                     |
| 96  | <i>KRT10</i>      | -175    | Hs | 1284070                                  | 28316      | Down regulation                                   |
| 97  | <i>KRT14</i>      | -91     | Hs | 1281867                                  | 533529     | Down regulation                                   |
| 98  | <i>KRT17</i>      | -113    | Hs | 9326392                                  | 20560567   | Down regulation                                   |
| 99  | <i>KRT18</i>      | -91     | Hs | 7667273                                  | 7339829    | Repeat                                            |
| 100 | <i>KRT5</i>       | 165     | Hs | 9326392                                  | 266236     | Down regulation; Intronic                         |
| 101 | <i>KRT6A or B</i> | various | Hs | 9326392                                  | See Note 1 | Down regulation; Orthologs                        |
| 102 | <i>Lamb1-1</i>    | -467    | Mm | 1850696                                  | 254625     | NA                                                |
| 103 | <i>Laptm5</i>     | -394    | Mm | 8839844                                  | 924940     | Motif(s) only; Repeat                             |
| 104 | <i>LPA</i>        | -1036   | Hs | 9535807                                  | 2323518    | Orthologs; Motif(s) only                          |
| 105 | <i>Ltf</i>        | -349    | Mm | 7623814                                  | 198789     | Receptors bind but there is no transactivation    |
| 106 | <i>Mdk</i>        | -971    | Mm | 7982887                                  | 530257     | NA                                                |
| 107 | <i>MGP</i>        | -138    | Hs | 9122176                                  | 3172535    | Down regulation; Motif(s) only                    |
| 108 | <i>Mixl1</i>      | -534    | Mm | 12095687                                 | 21744720   | Motif(s) only                                     |
| 109 | <i>Mixl1</i>      | -416    | Mm | 12095687                                 | 21744720   | Motif(s) only                                     |
| 110 | <i>Mmp11</i>      | -2141   | Mm | 10993903                                 | 10280608   | Repeat                                            |
| 111 | <i>MMP11</i>      | -2030   | Hs | 10993903                                 | 16168698   | Repeat                                            |
| 112 | <i>Mmp11</i>      | -385    | Hs | 7657606                                  | 984746     | NA                                                |
| 113 | <i>Mmp11</i>      | -367    | Mm | 10993903                                 | 10280608   | NA                                                |
| 114 | <i>MPO</i>        | -448    | Hs | 8662930                                  | 425516     | Repeat                                            |
| 115 | <i>Msx1</i>       | -804    | Mm | 7916326                                  | 688052     | Motif(s) only                                     |
| 116 | <i>MSX1</i>       | -336    | Hs | 7866431                                  | 20535188   | No site found (although there is transactivation) |
| 117 | <i>MUC5B</i>      | various | Hs | 11713095                                 | 11275567   | Motif(s) only                                     |
| 118 | <i>Mycn</i>       | -186    | Hs | 9570357                                  | 35074      | NA                                                |
| 119 | <i>Nes</i>        | 2378    | Hs | 10222142                                 | 2209203    | Intronic                                          |
| 120 | <i>Ngfr</i>       | -860    | Rn | 1446821                                  | 56207      | Repeat                                            |
| 121 | <i>Nr2c1</i>      | -136    | Mm | 10393558                                 | 2735500    | Sequence problem                                  |
| 122 | <i>OAS3</i>       | various | Hs | 11112351                                 | 8896067    | Orthologs; Motif(s) only                          |
| 123 | <i>Oxt</i>        | -162    | Hs | 1657967                                  | 20559789   | NA                                                |
| 124 | <i>Oxt</i>        | -103    | Hs | 1657967                                  | 20559789   | NA                                                |

| No. | Gene                             | Loc     | Sp | Ref PMID                                 | GI       | Reason Excluded                  |
|-----|----------------------------------|---------|----|------------------------------------------|----------|----------------------------------|
| 125 | <i>Pck1</i>                      | -451    | Rn | 1848696                                  | 4070995  | NA                               |
| 126 | <i>Pck1</i>                      | -337    | Rn | 8626419                                  | 4070995  | NA                               |
| 127 | <i>Pcp2</i>                      | 202     | Mm | 9224660                                  | 1679919  | Orthologs; Intronic              |
| 128 | <i>PECAM1</i>                    | -71     | Hs | 8955189                                  | 1743258  | Motif(s) only                    |
| 129 | <i>Pit1</i><br>( <i>Pou1f1</i> ) | -10145  | Mm | 8504933                                  | 20598604 | NA                               |
| 130 | <i>Pit1</i><br>( <i>Pou1f1</i> ) | -9999   | Mm | 8504933                                  | 20598604 | NA                               |
| 131 | <i>PLAT</i>                      | -7319   | Hs | 7706255                                  | 683752   | NA                               |
| 132 | <i>Pou5f1</i>                    | -45     | Mm | 0008289783;<br>0008289793                | 544952   | NA                               |
| 133 | <i>Prkca</i>                     | -93     | Mm | 10486248                                 | 51766637 | NA                               |
| 134 | <i>PTAFR</i>                     | -66     | Hs | 8570633                                  | 300030   | NA                               |
| 135 | <i>Ptgds</i>                     | -586    | Rn | 9582446                                  | 206116   | NA                               |
| 136 | <i>Pthr1</i>                     | -2714   | Rn | 10406468                                 | 15721867 | NA                               |
| 137 | <i>Ranbp1/<br/>Htf9</i>          | 27      | Mm | 9417108                                  | 6680314  | Intronic                         |
| 138 | <i>Rara</i>                      | -55     | Mm | 1658797                                  | 200654   | NA                               |
| 139 | <i>Rarb</i>                      | -53     | Hs | 0002153268;<br>0002177841;<br>0002164682 | 35881    | NA                               |
| 140 | <i>Rarg</i>                      | -393    | Hs | 1320193                                  | 297145   | NA                               |
| 141 | <i>RARRES3</i>                   | various | Hs | 9843971                                  | 2281065  | Motif(s) only                    |
| 142 | <i>Rbp1</i>                      | -1011   | Mm | 1648481                                  | 50547    | NA                               |
| 143 | <i>Rbp2</i>                      | -617    | Mm | 0001651173;<br>0008288643                | 397366   | Probably spurious                |
| 144 | <i>Rbp2</i>                      | -125    | Mm | 8288643                                  | 397366   | NA                               |
| 145 | <i>Rbp2</i>                      | -74     | Mm | 8288643                                  | 203586   | NA                               |
| 146 | <i>Rbp4</i>                      | -194    | Hs | 8810324                                  | 51467897 | NA                               |
| 147 | <i>Ren1</i>                      | -2674   | Mm | 11058598                                 | 1374947  | NA                               |
| 148 | <i>Rrg1</i>                      | 1       | Mm | 8754834                                  | 1245373  | Orthologs; Intronic              |
| 149 | <i>Rxrg</i>                      | -98     | Hs | 9006910                                  | 9366919  | NA                               |
| 150 | <i>Sag</i>                       | -206    | Mm | 7708064                                  | 54037    | Site only active in vivo         |
| 151 | <i>SERPINB2</i>                  | -1641   | Hs | See Note 2                               | 189558   | Motif(s) only                    |
| 152 | <i>SERPINC1</i>                  | -92     | Hs | 8761481                                  | 511791   | Motif(s) only; Probably spurious |
| 153 | <i>Sftpa1</i>                    | 1491    | Rn | 8944731                                  | 1147797  | Intronic                         |
| 154 | <i>SFTPB</i>                     | -458    | Hs | 10617585                                 | 338326   | NA                               |
| 155 | <i>SHH</i>                       | -258    | Dr | 9233805                                  | 13992722 | Fish only                        |
| 156 | <i>Slc10a1</i>                   | -53     | Rn | 10722729                                 | 1261825  | NA                               |
| 157 | <i>Slc9a2</i>                    | various | Rn | 9804979                                  | 3916117  | Motif(s) only                    |
| 158 | <i>SMPD1</i>                     | -513    | Hs | 11788605                                 | 19703148 | Motif(s) only                    |

| No. | Gene                             | Loc      | Sp | Ref PMID                | GI       | Reason Excluded          |
|-----|----------------------------------|----------|----|-------------------------|----------|--------------------------|
| 159 | <i>SPN</i>                       | -828     | Hs | 9174604                 | 180125   | Motif(s) only; Repeat    |
| 160 | <i>SPN</i>                       | -178     | Hs | 9174604                 | 180125   | Motif(s) only            |
| 161 | <i>Stat1</i>                     | -467     | Mm | 9092506                 | 1916072  | NA                       |
| 162 | <i>Tcf1</i>                      | -68      | Hs | 11027556                | 1854926  | NA                       |
| 163 | <i>Tgm2</i>                      | -1745    | Mm | 8626785                 | 1762323  | NA                       |
| 164 | <i>THBD</i>                      | -1531    | Hs | 0008207015;<br>11036068 | 19909347 | NA                       |
| 165 | <i>Thbd</i>                      | -941     | Mm | 8918245                 | 54780    | NA                       |
| 166 | <i>Tlx2</i>                      | -1163    | Mm | 10446220                | 5748488  | NA                       |
| 167 | <i>TRIM31</i>                    | -400     | Hs | 12170760                | 22056653 | Orthologs; Motif(s) only |
| 168 | <i>Tshb</i>                      | -204     | Rn | 9296372                 | 207531   | Down regulation          |
| 169 | <i>TXN</i>                       | -626     | Hs | 11970916                | 3599465  | Motif(s) only            |
| 170 | <i>Tyr</i>                       | various  | Mm | 7620342                 | 220624   | Motif(s) only            |
| 171 | <i>Ucp1</i>                      | -2480    | Rn | 8754778                 | 57444    | Motif(s) only            |
| 172 | <i>Ucp3</i>                      | -71      | Hs | 11024001                | 9937094  | NA                       |
| 173 | <i>VDR</i>                       | Intronic | Hs | 0009212063;<br>10919269 | 22062255 | Intronic                 |
| 174 | <i>VIPR1</i>                     | -747     | Hs | 7708752                 | 508250   | Motif(s) only            |
| 175 | <i>Wnt1</i>                      | Region   | Mm | 7925022                 | 2761013  | Probably spurious        |
| 176 | <i>ZNF42</i><br>( <i>Zfp98</i> ) | -830     | Hs | 8845378                 | 1184871  | Motif(s) only            |

*Notes:*

1. It is not possible to tell what gene the paper is about—either from the paper itself or from the sequence fragments it presents. The region BLASTS identically to *Krt6A*, *-B*, and *-C*.
2. There is no PMID for this paper (the journal was not indexed for Medline at the time the paper was written, and seems now to be defunct). See *Fibrinolysis* **8(2)**: 113-119 (1994).
