# Supplementary material
Source: PubMed Central journal article supplement (PMC1686202)
Supplement: rsbl20060484s17.pdf [file rsbl20060484s17.pdf]

## Supplementary Table 2. Computed Values of Module Parameters

This table shows the computed values of various parameters for the individual modules. Recall that in five cases, no evidence of modularity was found (based on the footprinting methodology). Values are for three-species alignments.

Key: *Symb* = Gene symbol; *Loc* = Site location relative to the most relevant transcription start point; *Trunc* = Module truncated at transcription start or not; *MmRn* = Percent ID, mouse and rat; *MmHs* = Percent ID, mouse and man; *HsRn* = Percent ID, rat and man; *ID* = Percent ID for all three species; *GCx* = G/C content for species x; *Disp* = Measure of dispersal (see text); *Blks* = Number of blocks of length  $\geq 5$  with identical nucleotides in all three species; *Cent* = Measure of centrality (see text); *SiteLoc* = Relative position of the 5'-most nucleotide in the site<sup>\*</sup>; *Rep* = Whether the module contains any repeats; *Clsr* = Which species is closer to Hs (assuming a difference of more than 1% in the two measures) 'S' indicates that the difference is less than 1%, so the two rodents are about equally close to Hs; *Len* = Module length;  $\mu$  *Blk* = Mean block size based only on blocks of identity  $\geq 5$  nucleotides; *In.Blk* = proportion nucleotides that are in blocks of length  $\geq 1$ .

\* Surprisingly, this does not appear to be normally distributed, even among non-truncated blocks.

| <i>Symb</i>    | <i>Loc</i> | <i>Trunc</i> | <i>MmRn</i> | <i>MmHs</i> | <i>HsRn</i> | <i>ID</i> | <i>GCm</i> | <i>GCh</i> | <i>GCr</i> | <i>Disp</i> | <i>Blks</i> | <i>Cent</i> | <i>SiteLoc</i> | <i>Rep</i> | <i>Clsr</i> | <i>Len</i> | $\mu$ <i>Blk</i> | <i>In.Blk</i> |
|----------------|------------|--------------|-------------|-------------|-------------|-----------|------------|------------|------------|-------------|-------------|-------------|----------------|------------|-------------|------------|------------------|---------------|
| <i>Abcc2</i>   | -413       | 0            | 0.823       | 0.573       | 0.544       | 0.510     | 0.314      | 0.303      | 0.297      | 1.276       | 7           | 0.383       | 0.816          | 1          | M           | 196        | 5.6              | 0.51          |
| <i>ACADM</i>   | -336       | 0            | 0.802       | 0.435       | 0.470       | 0.400     | 0.468      | 0.529      | 0.470      | 1.070       | 4           | 0.546       | 0.639          | 0          | R           | 230        | 8.0              | 0.40          |
| <i>Adrb1</i>   | -41        | 1            | 0.827       | 0.635       | 0.631       | 0.582     | 0.724      | 0.722      | 0.758      | 2.884       | 25          | 0.570       | 0.950          | 0          | S           | 661        | 10.1             | 0.58          |
| <i>Afp</i>     | -6327      | 0            | 0.882       | 0.559       | 0.580       | 0.525     | 0.452      | 0.467      | 0.391      | 1.539       | 12          | 0.559       | 0.512          | 0          | R           | 295        | 6.8              | 0.53          |
| <i>Afp</i>     | -139       | 1            | 0.882       | 0.559       | 0.580       | 0.525     | 0.452      | 0.467      | 0.391      | 1.539       | 12          | 0.559       | 0.512          | 0          | R           | 295        | 6.8              | 0.64          |
| <i>Aldh1a1</i> | -91        | 1            | 0.843       | 0.676       | 0.659       | 0.615     | 0.455      | 0.471      | 0.404      | 2.184       | 20          | 0.555       | 0.850          | 0          | M           | 548        | 8.4              | 0.61          |
| <i>Apoa1</i>   | -210       | 1            | 0.946       | 0.764       | 0.767       | 0.740     | 0.603      | 0.591      | 0.620      | 3.717       | 14          | 0.492       | 0.213          | 0          | S           | 258        | 9.5              | 0.74          |
| <i>Apoa1</i>   | -132       | 1            | 0.946       | 0.764       | 0.767       | 0.740     | 0.603      | 0.591      | 0.620      | 3.717       | 14          | 0.492       | 0.512          | 0          | S           | 258        | 9.5              | 0.74          |
| <i>APOA2</i>   | -733       | 0            | 0.873       | 0.522       | 0.536       | 0.500     | 0.517      | 0.488      | 0.518      | 2.025       | 9           | 0.538       | 0.525          | 0          | R           | 276        | 8.9              | 0.50          |
| <i>Apoc3</i>   | -732       | 0            | 0.778       | 0.677       | 0.590       | 0.559     | 0.585      | 0.597      | 0.676      | 1.712       | 6           | 0.471       | 0.221          | 0          | M           | 222        | 7.7              | 0.56          |
| <i>Apoc3</i>   | -83        | 1            | 0.764       | 0.479       | 0.495       | 0.439     | 0.583      | 0.567      | 0.613      | 1.446       | 18          | 0.697       | 0.861          | 0          | R           | 547        | 7.1              | 0.44          |
| <i>Bmp2</i>    | -2373      | 1            | 0.916       | 0.682       | 0.688       | 0.657     | 0.676      | 0.677      | 0.701      | 3.065       | 62          | 0.508       | 0.210          | 0          | S           | 1364       | 8.7              | 0.66          |
| <i>Cdx1</i>    | -511       | 1            | 0.823       | 0.557       | 0.551       | 0.504     | 0.563      | 0.570      | 0.553      | 2.618       | 39          | 0.592       | 0.422          | 0          | S           | 1237       | 9.9              | 0.50          |
| <i>Crabp1</i>  | -1008      | 0            | 0.849       | 0.514       | 0.500       | 0.469     | 0.479      | 0.481      | 0.416      | 1.850       | 8           | 0.577       | 0.510          | 0          | M           | 294        | 8.8              | 0.47          |
| <i>Crabp2</i>  | -1090      | 0            | 0.875       | 0.486       | 0.473       | 0.443     | 0.596      | 0.602      | 0.609      | 1.333       | 5           | 0.481       | 0.492          | 0          | M           | 183        | 7.4              | 0.44          |
| <i>Crabp2</i>  | -586       | 0            | 0.938       | 0.675       | 0.637       | 0.634     | 0.595      | 0.589      | 0.650      | 3.576       | 10          | 0.532       | 0.447          | 1          | M           | 295        | 10.8             | 0.63          |
| <i>Cryab</i>   | -132       | 0            | 0.888       | 0.711       | 0.714       | 0.672     | 0.546      | 0.536      | 0.583      | 3.896       | 47          | 0.579       | 0.885          | 0          | S           | 1076       | 10.9             | 0.67          |
| <i>Cryab</i>   | -69        | 0            | 0.888       | 0.711       | 0.714       | 0.672     | 0.546      | 0.536      | 0.583      | 3.896       | 47          | 0.579       | 0.942          | 0          | S           | 1076       | 10.9             | 0.67          |
| <i>CYP1A1</i>  | -468       | 0            | 0.812       | 0.575       | 0.546       | 0.502     | 0.561      | 0.538      | 0.725      | 1.783       | 10          | 0.375       | 0.512          | 0          | M           | 295        | 8.6              | 0.50          |
| <i>CYP24A1</i> | -291       | 1            | 0.871       | 0.574       | 0.567       | 0.534     | 0.596      | 0.586      | 0.619      | 2.141       | 30          | 0.554       | 0.553          | 0          | S           | 861        | 8.3              | 0.53          |
| <i>CYP24A1</i> | -269       | 1            | 0.871       | 0.574       | 0.567       | 0.534     | 0.596      | 0.586      | 0.619      | 2.141       | 30          | 0.554       | 0.707          | 0          | S           | 861        | 8.3              | 0.53          |
| <i>Cyp7a1</i>  | -139       | 1            | 0.861       | 0.687       | 0.693       | 0.628     | 0.413      | 0.439      | 0.368      | 2.181       | 13          | 0.446       | 0.517          | 0          | S           | 298        | 7.7              | 0.63          |
| <i>DIO1</i>    | -105       | 1            | 0.667       | 0.646       | 0.555       | 0.485     | 0.477      | 0.476      | 0.426      | 1.509       | 11          | 0.537       | 0.677          | 0          | M           | 328        | 7.5              | 0.48          |
| <i>Drd2</i>    | -66        | 1            | 0.873       | 0.540       | 0.505       | 0.479     | 0.703      | 0.662      | 0.721      | 1.484       | 7           | 0.545       | 0.704          | 0          | M           | 213        | 7.3              | 0.48          |

| <i>Symb</i>    | <i>Loc</i> | <i>Trunc</i> | <i>MmRn</i> | <i>MmHs</i> | <i>HsRn</i> | <i>ID</i> | <i>Gcm</i> | <i>GCh</i> | <i>GCr</i> | <i>Disp</i> | <i>Blks</i> | <i>Cent</i> | <i>SiteLoc</i> | <i>Rep</i> | <i>Clsr</i> | <i>Len</i> | $\mu$ <i>Blk</i> | <i>In.Blk</i> |
|----------------|------------|--------------|-------------|-------------|-------------|-----------|------------|------------|------------|-------------|-------------|-------------|----------------|------------|-------------|------------|------------------|---------------|
| <i>Ebaf</i>    | -70        | 1            | 0.840       | 0.733       | 0.721       | 0.665     | 0.585      | 0.601      | 0.658      | 4.132       | 8           | 0.467       | 0.533          | 0          | M           | 167        | 10.5             | 0.66          |
| <i>Egr1</i>    | -469       | 1            | 0.915       | 0.708       | 0.710       | 0.678     | 0.636      | 0.640      | 0.675      | 3.820       | 79          | 0.554       | 0.714          | 0          | S           | 1742       | 9.7              | 0.68          |
| <i>ETS1</i>    | -432       | 0            | 0.842       | 0.589       | 0.574       | 0.535     | 0.663      | 0.669      | 0.687      | 3.090       | 19          | 0.405       | 0.355          | 0          | M           | 592        | 10.3             | 0.54          |
| <i>Fgf8</i>    | -4542      | 0            | 0.849       | 0.652       | 0.652       | 0.606     | 0.542      | 0.528      | 0.586      | 4.417       | 41          | 0.479       | 0.846          | 0          | S           | 1009       | 10.3             | 0.61          |
| <i>Foxa1</i>   | -1094      | 1            | 0.862       | 0.653       | 0.665       | 0.613     | 0.507      | 0.511      | 0.515      | 4.417       | 109         | 0.563       | 0.604          | 0          | R           | 2734       | 10.4             | 0.61          |
| <i>Gh1</i>     | -190       | 1            | 0.913       | 0.621       | 0.617       | 0.587     | 0.543      | 0.521      | 0.537      | 2.911       | 9           | 0.548       | 0.342          | 0          | S           | 269        | 9.9              | 0.59          |
| <i>Gnrh1</i>   | -1490      | 0            | 0.807       | 0.595       | 0.620       | 0.558     | 0.359      | 0.358      | 0.310      | 1.884       | 36          | 0.524       | 0.908          | 0          | R           | 960        | 7.5              | 0.56          |
| <i>H1fo</i>    | -531       | 1            | 0.907       | 0.763       | 0.762       | 0.733     | 0.680      | 0.679      | 0.699      | 5.848       | 41          | 0.546       | 0.442          | 0          | S           | 961        | 11.9             | 0.73          |
| <i>Hnf4a</i>   | -295       | 1            | 0.751       | 0.600       | 0.576       | 0.519     | 0.540      | 0.513      | 0.553      | 2.256       | 25          | 0.636       | 0.581          | 0          | M           | 724        | 9.0              | 0.52          |
| <i>Hoxa4</i>   | -3054      | 0            | 0.859       | 0.780       | 0.773       | 0.723     | 0.421      | 0.436      | 0.404      | 7.609       | 80          | 0.498       | 0.356          | 0          | S           | 1750       | 12.0             | 0.72          |
| <i>Hoxa7</i>   | -238       | 1            | 0.921       | 0.795       | 0.759       | 0.751     | 0.506      | 0.513      | 0.564      | 4.599       | 20          | 0.516       | 0.603          | 0          | M           | 317        | 9.6              | 0.75          |
| <i>Hoxa7</i>   | -175       | 1            | 0.921       | 0.795       | 0.759       | 0.751     | 0.506      | 0.513      | 0.564      | 4.599       | 20          | 0.516       | 0.804          | 0          | M           | 317        | 9.6              | 0.75          |
| <i>Hoxb1</i>   | -1623      | 1            | 0.880       | 0.733       | 0.733       | 0.692     | 0.488      | 0.495      | 0.502      | 5.504       | 88          | 0.543       | 0.089          | 0          | S           | 1787       | 10.8             | 0.69          |
| <i>Hoxd4</i>   | -2551      | 1            | 0.857       | 0.668       | 0.668       | 0.626     | 0.500      | 0.498      | 0.516      | 4.966       | 68          | 0.525       | 0.178          | 0          | S           | 1763       | 10.9             | 0.63          |
| <i>Icam1</i>   | -225       | 0            | 0.814       | 0.643       | 0.626       | 0.588     | 0.651      | 0.649      | 0.670      | 2.259       | 10          | 0.593       | 0.605          | 0          | M           | 243        | 8.5              | 0.59          |
| <i>Igfbp6</i>  | -27        | 1            | 0.788       | 0.558       | 0.585       | 0.507     | 0.516      | 0.557      | 0.574      | 1.977       | 17          | 0.635       | 0.972          | 0          | R           | 471        | 7.9              | 0.51          |
| <i>Lamb1-1</i> | -467       | 1            | 0.753       | 0.656       | 0.567       | 0.537     | 0.564      | 0.572      | 0.624      | 2.384       | 32          | 0.494       | 0.300          | 0          | M           | 773        | 8.1              | 0.54          |
| <i>Mdk</i>     | -971       | 0            | 0.831       | 0.580       | 0.589       | 0.537     | 0.577      | 0.570      | 0.671      | 2.166       | 30          | 0.475       | 0.445          | 1          | S           | 894        | 8.3              | 0.54          |
| <i>Mmp11</i>   | -385       | 0            | 0.788       | 0.512       | 0.504       | 0.451     | 0.523      | 0.534      | 0.542      | 1.187       | 7           | 0.537       | 0.155          | 1          | S           | 284        | 6.6              | 0.45          |
| <i>Mmp11</i>   | -367       | 0            | 0.788       | 0.512       | 0.504       | 0.451     | 0.523      | 0.534      | 0.542      | 1.187       | 7           | 0.537       | 0.613          | 1          | S           | 284        | 6.6              | 0.45          |
| <i>Mycn</i>    | -186       | 1            | 0.929       | 0.831       | 0.854       | 0.814     | 0.565      | 0.570      | 0.596      | 7.505       | 14          | 0.542       | 0.424          | 1          | R           | 295        | 13.8             | 0.81          |
| <i>Oxt</i>     | -162       | 1            | 0.844       | 0.589       | 0.580       | 0.533     | 0.533      | 0.529      | 0.627      | 1.402       | 9           | 0.545       | 0.524          | 0          | S           | 353        | 6.9              | 0.53          |
| <i>Oxt</i>     | -103       | 1            | 0.844       | 0.589       | 0.580       | 0.533     | 0.533      | 0.529      | 0.627      | 1.402       | 9           | 0.545       | 0.728          | 0          | S           | 353        | 6.9              | 0.53          |
| <i>Pck1</i>    | -451       | 0            | 0.905       | 0.653       | 0.631       | 0.613     | 0.515      | 0.529      | 0.484      | 2.434       | 37          | 0.512       | 0.116          | 0          | M           | 708        | 7.9              | 0.61          |
| <i>Pck1</i>    | -337       | 0            | 0.905       | 0.653       | 0.631       | 0.613     | 0.515      | 0.529      | 0.484      | 2.434       | 37          | 0.512       | 0.297          | 0          | M           | 708        | 7.9              | 0.65          |
| <i>Pit1</i>    | -10145     | 0            | 0.859       | 0.700       | 0.688       | 0.647     | 0.316      | 0.302      | 0.282      | 2.710       | 31          | 0.503       | 0.510          | 0          | M           | 731        | 8.7              | 0.65          |
| <i>Pit1</i>    | -9999      | 0            | 0.859       | 0.700       | 0.688       | 0.647     | 0.316      | 0.302      | 0.282      | 2.710       | 31          | 0.503       | 0.718          | 0          | M           | 731        | 8.7              | 0.65          |
| <i>PLAT</i>    | -7319      | 0            | 0.762       | 0.618       | 0.619       | 0.545     | 0.525      | 0.523      | 0.538      | 2.218       | 3           | 0.595       | 0.500          | 0          | S           | 110        | 8.3              | 0.55          |
| <i>Pousf1</i>  | -45        | 1            | 0.928       | 0.865       | 0.883       | 0.856     | 0.667      | 0.613      | 0.654      | 7.640       | 6           | 0.559       | 0.676          | 0          | R           | 111        | 12.8             | 0.86          |
| <i>Prkca</i>   | -93        | 1            | 0.902       | 0.663       | 0.655       | 0.627     | 0.453      | 0.466      | 0.439      | 2.657       | 23          | 0.408       | 0.807          | 0          | S           | 461        | 8.3              | 0.63          |
| <i>PTAFR</i>   | -66        | 1            | 0.816       | 0.632       | 0.619       | 0.564     | 0.560      | 0.532      | 0.647      | 2.439       | 11          | 0.537       | 0.801          | 0          | M           | 296        | 8.0              | 0.56          |
| <i>Ptgds</i>   | -586       | 0            | 0.899       | 0.589       | 0.557       | 0.539     | 0.536      | 0.518      | 0.608      | 1.500       | 10          | 0.589       | 0.300          | 0          | M           | 280        | 6.5              | 0.54          |
| <i>Pthr1</i>   | -2714      | 0            | 0.840       | 0.634       | 0.636       | 0.580     | 0.549      | 0.548      | 0.590      | 2.148       | 55          | 0.539       | 0.657          | 0          | S           | 1400       | 7.7              | 0.58          |
| <i>Rara</i>    | -55        | 1            | 0.906       | 0.656       | 0.645       | 0.620     | 0.582      | 0.577      | 0.629      | 3.209       | 37          | 0.532       | 0.948          | 0          | M           | 764        | 9.6              | 0.62          |
| <i>Rarb</i>    | -53        | 1            | 0.959       | 0.684       | 0.706       | 0.684     | 0.578      | 0.583      | 0.486      | 9.375       | 8           | 0.650       | 0.864          | 0          | R           | 323        | 21.8             | 0.68          |
| <i>Rarg</i>    | -393       | 1            | 0.931       | 0.699       | 0.720       | 0.686     | 0.626      | 0.620      | 0.645      | 3.542       | 39          | 0.532       | 0.537          | 0          | R           | 876        | 10.0             | 0.69          |
| <i>Rbp1</i>    | -1011      | 0            | 0.826       | 0.458       | 0.480       | 0.426     | 0.434      | 0.391      | 0.389      | 1.213       | 5           | 0.468       | 0.317          | 0          | R           | 202        | 6.2              | 0.43          |
| <i>Rbp2</i>    | -125       | 1            | 0.916       | 0.680       | 0.687       | 0.658     | 0.482      | 0.479      | 0.486      | 2.429       | 15          | 0.513       | 0.611          | 0          | S           | 319        | 8.1              | 0.66          |
| <i>Rbp2</i>    | -74        | 1            | 0.916       | 0.680       | 0.687       | 0.658     | 0.482      | 0.479      | 0.486      | 2.429       | 15          | 0.513       | 0.771          | 0          | S           | 319        | 8.1              | 0.66          |
| <i>Rbp4</i>    | -194       | 1            | 0.914       | 0.627       | 0.614       | 0.593     | 0.536      | 0.538      | 0.553      | 2.631       | 43          | 0.482       | 0.839          | 0          | M           | 915        | 8.1              | 0.59          |
| <i>Ren1</i>    | -2674      | 0            | 0.875       | 0.721       | 0.694       | 0.656     | 0.527      | 0.554      | 0.543      | 2.477       | 12          | 0.555       | 0.960          | 0          | M           | 302        | 9.0              | 0.66          |
| <i>Rxrg</i>    | -98        | 1            | 0.920       | 0.772       | 0.782       | 0.746     | 0.496      | 0.481      | 0.461      | 3.758       | 14          | 0.558       | 0.744          | 0          | R           | 355        | 10.0             | 0.75          |
| <i>SFTPB</i>   | -458       | 1            | 0.791       | 0.567       | 0.572       | 0.503     | 0.567      | 0.568      | 0.589      | 1.561       | 21          | 0.523       | 0.479          | 0          | S           | 749        | 7.8              | 0.50          |
| <i>Slc10a1</i> | -53        | 1            | 0.817       | 0.471       | 0.455       | 0.421     | 0.459      | 0.461      | 0.530      | 1.479       | 3           | 0.380       | 0.355          | 0          | M           | 121        | 7.0              | 0.42          |
| <i>Stat1</i>   | -467       | 0            | 0.803       | 0.507       | 0.539       | 0.471     | 0.350      | 0.358      | 0.394      | 1.141       | 9           | 0.586       | 0.454          | 1          | R           | 361        | 6.2              | 0.47          |
| <i>Tcf1</i>    | -68        | 1            | 0.895       | 0.705       | 0.702       | 0.659     | 0.615      | 0.598      | 0.598      | 4.816       | 16          | 0.615       | 0.849          | 0          | S           | 370        | 8.8              | 0.66          |
| <i>Tlx2</i>    | -1163      | 0            | 0.906       | 0.729       | 0.715       | 0.688     | 0.622      | 0.622      | 0.620      | 3.584       | 33          | 0.527       | 0.879          | 0          | M           | 770        | 10.5             | 0.69          |
| <i>Ucp3</i>    | -71        | 1            | 0.892       | 0.648       | 0.648       | 0.615     | 0.529      | 0.515      | 0.516      | 3.061       | 15          | 0.557       | 0.821          | 0          | S           | 358        | 9.5              | 0.61          |
